# Supplementary material for: Culture of all sputum samples irrespective of quality adds value to the diagnosis of pneumococcal community-acquired pneumonia in the elderly
Source: PubMed Central journal article supplement (PMC6570659; doi:10.1007/s10096-019-03536-9), 2019-04-04
Supplement: 10096_2019_3536_MOESM1_ESM.pdf [file 10096_2019_3536_MOESM1_ESM.pdf]

Culture of all sputum samples irrespective of quality adds value to the diagnosis of pneumococcal community-acquired pneumonia in the elderly. *European Journal of Clinical Microbiology & Infectious Diseases*.

By: Annika Saukkoriipi\*, Arto A. Palmu, Jukka Jokinen.

\*Corresponding author: National Institute for Health and Welfare, Oulu, Finland, e-mail: [annika.saukkoriipi@thl.fi](mailto:annika.saukkoriipi@thl.fi).

### Online resource 1

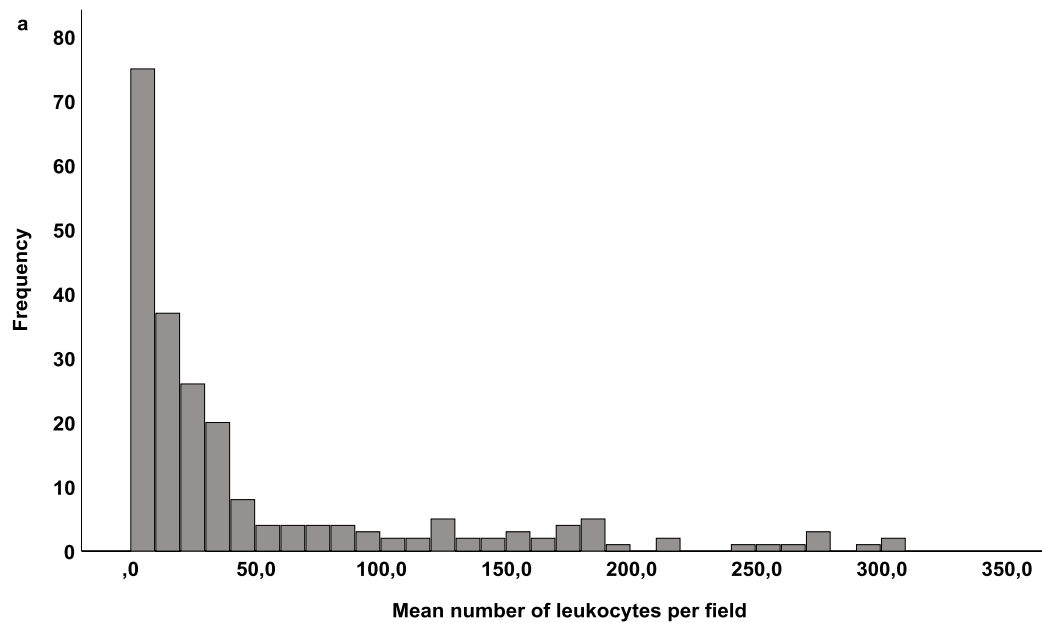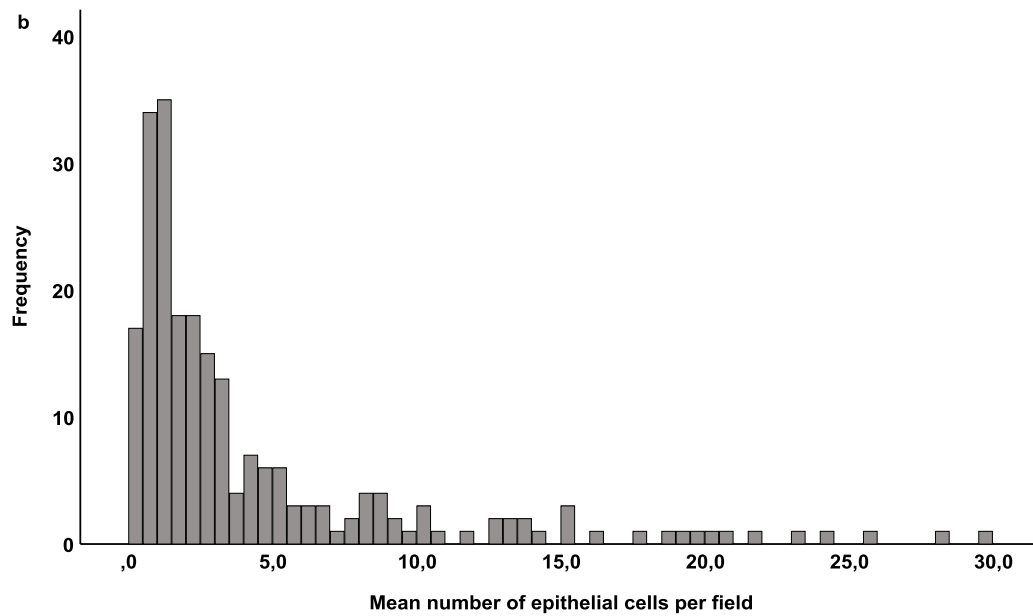

**Supplementary Fig 1** The mean numbers of leukocytes per field (a) and squamous epithelial cells per field (b) in the sputum samples of the 224 cases of community-acquired pneumonia.

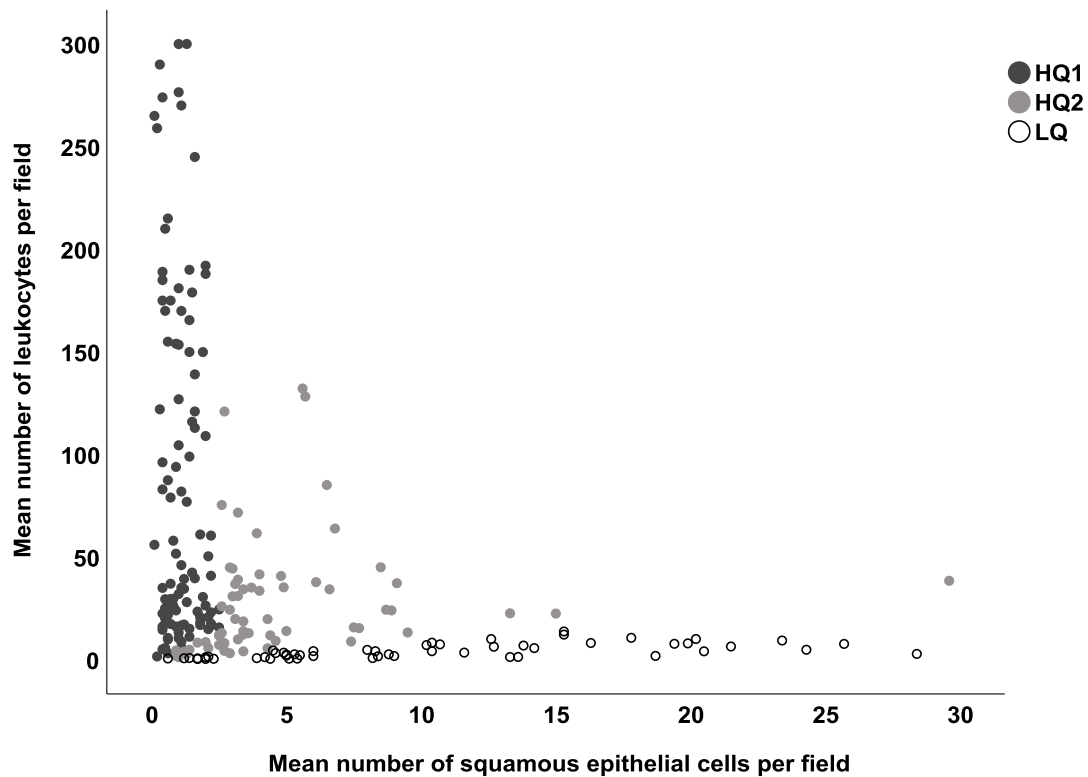

**Supplementary Fig 2** The mean number of leukocytes per field versus squamous epithelial cells per field in the 106 sputum samples fulfilling the more stringent criterion for high quality, HQ1 ( $\leq 2.5$  SECs per field at a 400x magnification and a leukocytes/epithelial cells ratio  $> 5$ ), in the 64 sputum samples not fulfilling the HQ1 criterion but fulfilling the less stringent criterion for high quality, HQ2 (leukocytes/epithelial cells  $> 1$ ), and in the 54 sputum samples fulfilling neither the HQ1 criterion nor the HQ2 criterion (low-quality, LQ).
